# Supplementary material
Source: ML conference proceedings conference paper supplement (https://proceedings.neurips.cc/paper_files/paper/2020/hash/59accb9fe696ce55e28b7d23a009e2d1-Abstract.html)

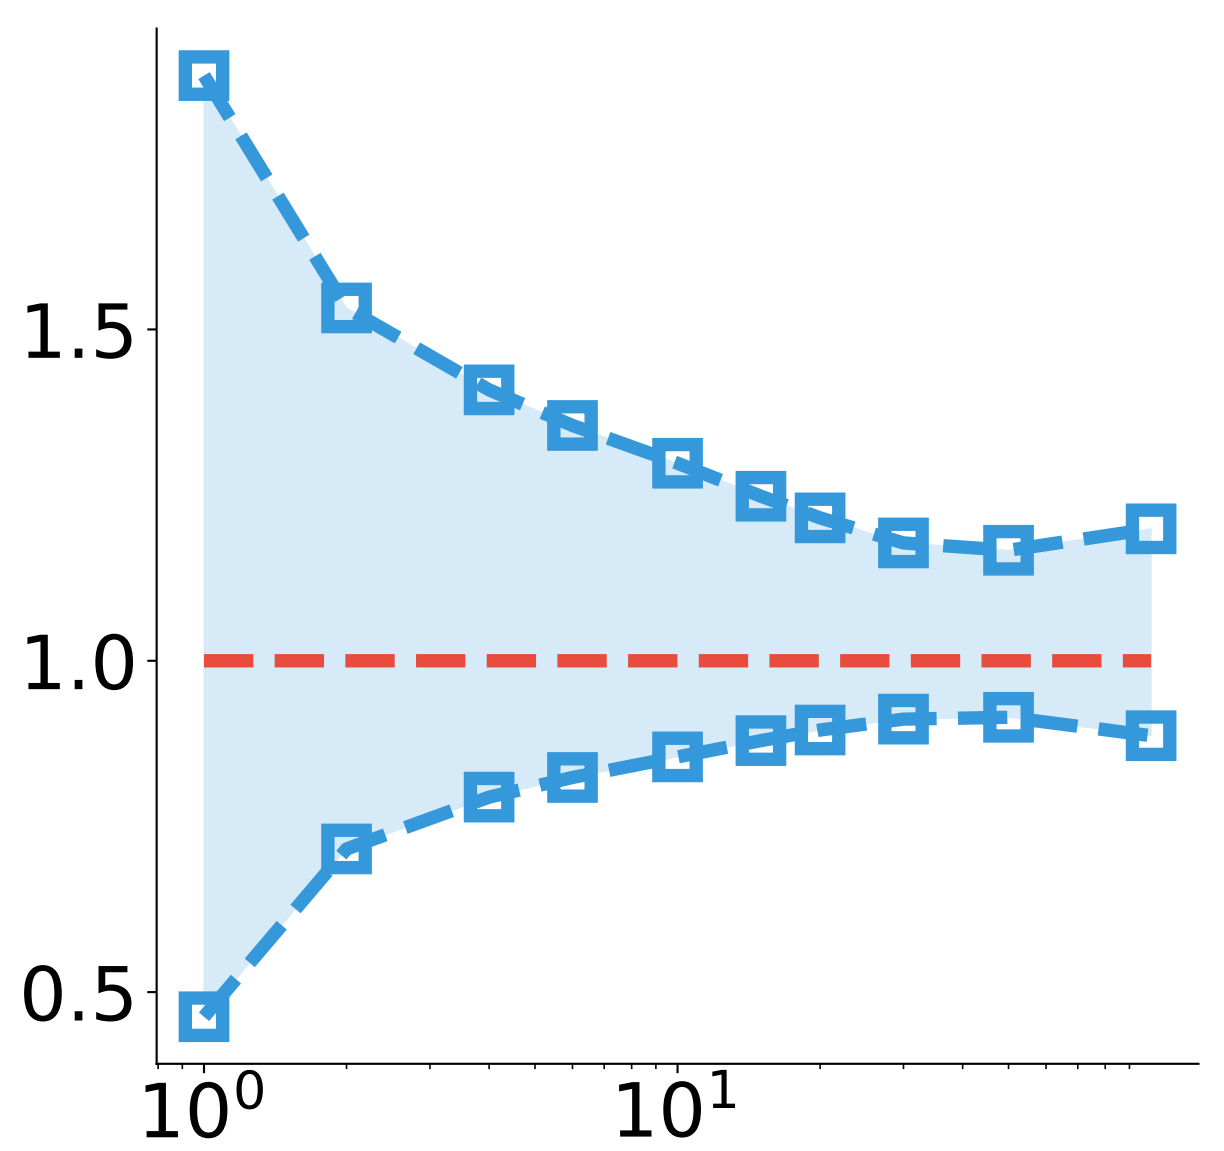

Supplement: Supplementary file [file 59accb9fe696ce55e28b7d23a009e2d1-Supplemental.zip]
